# Supplementary material for: Self-assembly of hyaluronic acid-mediated tumor-targeting theranostic nanoparticles
Source: Royal Society of Chemistry journal article supplement (doi:10.1039/d0bm01855d), 2021-01-01
Supplement: d0bm01855d1.pdf [file d0bm01855d1.pdf]

## Supporting Information

### Self-assembly of Hyaluronic Acid-mediated Tumor- targeting Theranostics Nanoparticles

Xiaoxuan Zhou,<sup>1, §</sup> Chengbin He,<sup>1, §</sup> Min Liu,<sup>1</sup> Qingqing Chen,<sup>1</sup> Lingjie Zhang,<sup>1</sup>  
Xiaodan Xu,<sup>2</sup> Hongxia Xu,<sup>2</sup> Yue Qian,<sup>1</sup> Feidan Yu,<sup>1</sup> Yan Wu,<sup>1</sup> Yuxin Han,<sup>1</sup> Bing  
Xiao,<sup>2\*</sup> Jianbin Tang,<sup>2\*</sup> Hongjie Hu<sup>1\*</sup>

<sup>1</sup> Department of Radiology, Sir Run Run Shaw Hospital (SRRSH) of School of  
Medicine, Zhejiang University, Hangzhou, Zhejiang, 310016, China.

<sup>2</sup> Key Laboratory of Biomass Chemical Engineering of Ministry of Education, Center  
for Bionanoengineering, and College of Chemical and Biological Engineering,  
Zhejiang University, Hangzhou, Zhejiang, 310027, China.

\*Corresponding Author: [xiaobingphd@zju.edu.cn](mailto:xiaobingphd@zju.edu.cn), [jianbin@zju.edu.cn](mailto:jianbin@zju.edu.cn),  
[hongjiehu@zju.edu.cn](mailto:hongjiehu@zju.edu.cn)

§These authors equally contributed to this work.

### **Synthesis of Cy5.5-labeled HMDN**

The 5 mL HMDN solution (3mg mL<sup>-1</sup>) was mixed with 300 µL Cy5.5-NHS (1 mg mL<sup>-1</sup>), stirred for 12 h in the dark, and purified by ultrafiltration (molecularweight cut-off: 3 K Da).

### ***In vivo* PTT**

For *in vitro* photothermal experiment, temperature change of HMDN under four laser irradiation on/off cycles was recored by a photothermal imager. Besides, the temperature changes of HMDN at different concentrations (0.75, 0.5, 0.25, 0.125 mg mL<sup>-1</sup>) under laser irradiation (808 nm, 2 W cm<sup>-2</sup>, 5 min), were recorded every ten seconds.

### **Colloidal and Optical Stability Measuremen**

For the observation of colloidal stabilization, 1 mg mL<sup>-1</sup> of HMDN were dispersed in DI water, PBS, RPMI-1640 culture medium, and normal saline, respectively. Hydrodynamic diameters were monitored throughout a period of 7 days.

### **Statistical analysis**

Quantitative data were expressed as the mean ± standard deviation, as discribed in the figure legends. Statistical analysis was conducted using a Student's t-test. Significant differences were estimated by \* $p < 0.05$ , \*\* $p < 0.01$ , \*\*\* $p < 0.001$ .

### **Supporting data**

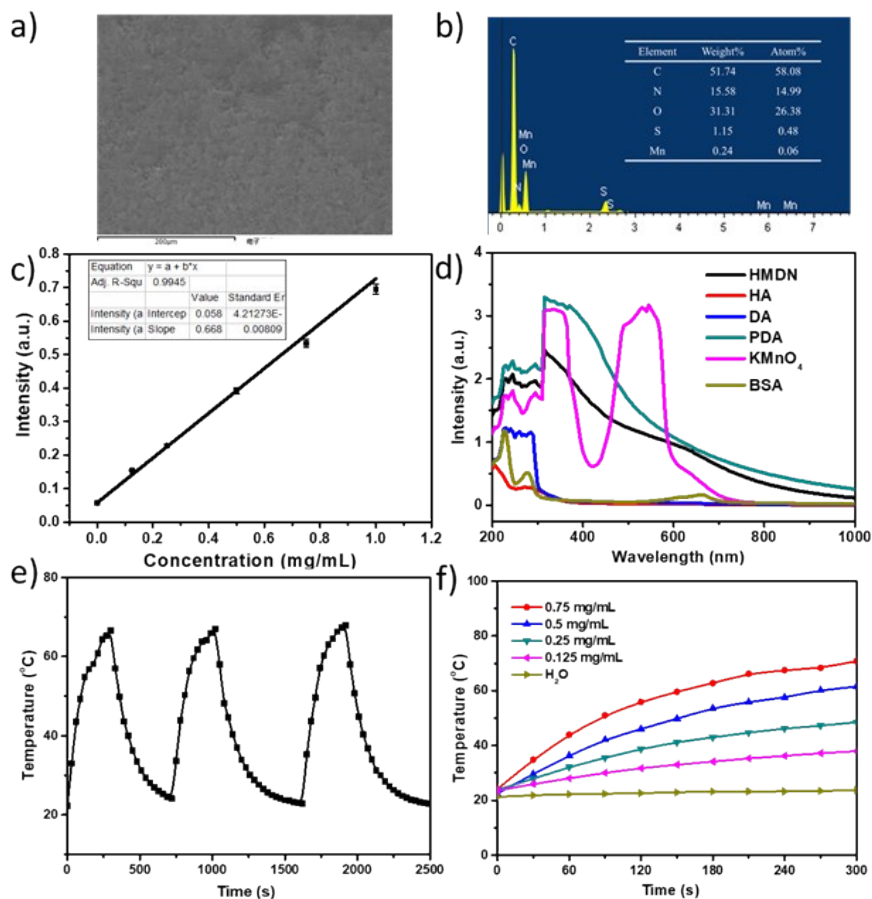

Figure S1. (a) The EDS data of the HMDN. (b) UV-vis absorption spectra of HMDN, HA, DA, PDA, KMnO<sub>4</sub> and BSA solutions. (c) The intensity at 808 nm as a function of HMDN concentration. (d) Absorption spectra of HMDN, HA, DA, PDA, BSA and KMnO<sub>4</sub> solutions. (e) Changes in temperature of the HMDN upon laser irradiation (808 nm, 2.0 W cm<sup>-2</sup>, and 5 min) for three laser on/off cycles. (f) Photothermal heating profile of the HMDN at different concentration under laser irradiation (808 nm, 2.0 W cm<sup>-2</sup>, and 5 min).

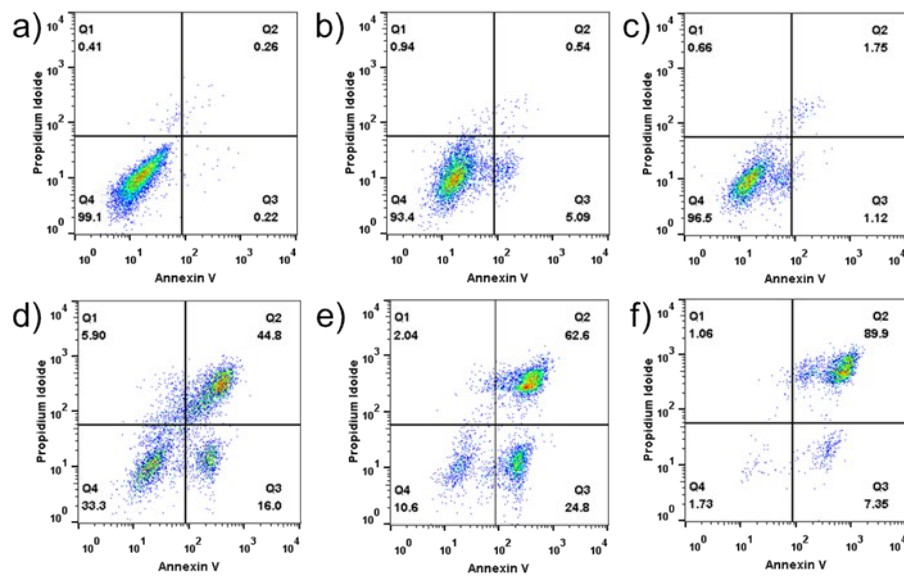

Figure S2. Flow cytometry-based apoptosis of 4T1 cells. (a) PBS only, (b) Laser only, (c) HMDN only (55  $\mu\text{M}$  Mn), (d) HMDN with free HA under laser, (e) MDN under laser, (f) HMDN under laser (808 nm, 2W  $\text{cm}^{-2}$ , 5 min).

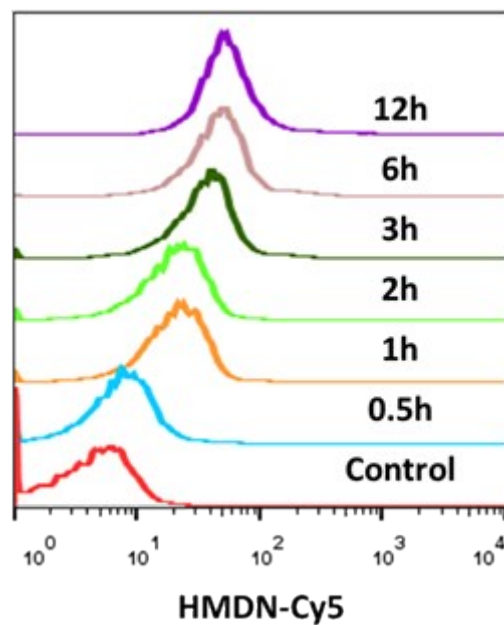

Figure S3. Flow cytometry analysis of cellular uptake of Cy5.5-labeled HMDN (55  $\mu\text{M}$  Mn) at different times.

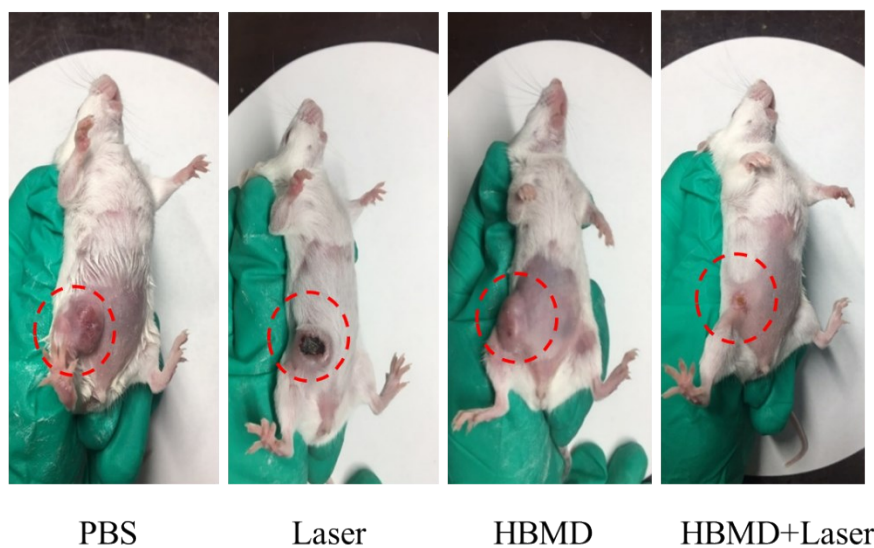

Figure S4. Representative photographs of mice bearing orthotropic 4T1 tumors after different treatments (as indicated) taken on day 15.

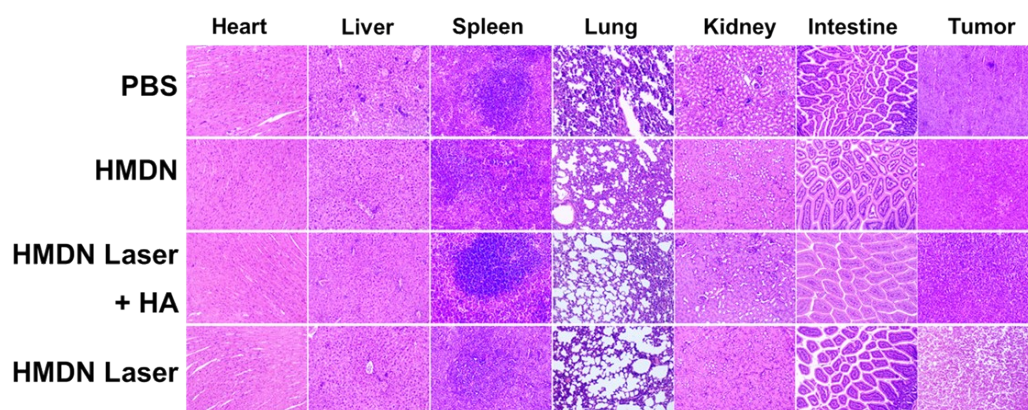

Figure S5. H&E-stained images of the major organs from four different treatment groups (PBS, HMDN, HMDN plus HA with PTT 5 min, and HMDN with PTT 5 min) mice after 15 days ( $0.02 \text{ mmol kg}^{-1} \text{ Mn}$ ,  $808 \text{ nm}$ ,  $2 \text{ W cm}^{-2}$ ). Scale bar  $200 \mu\text{m}$ , magnification  $\times 200$ .

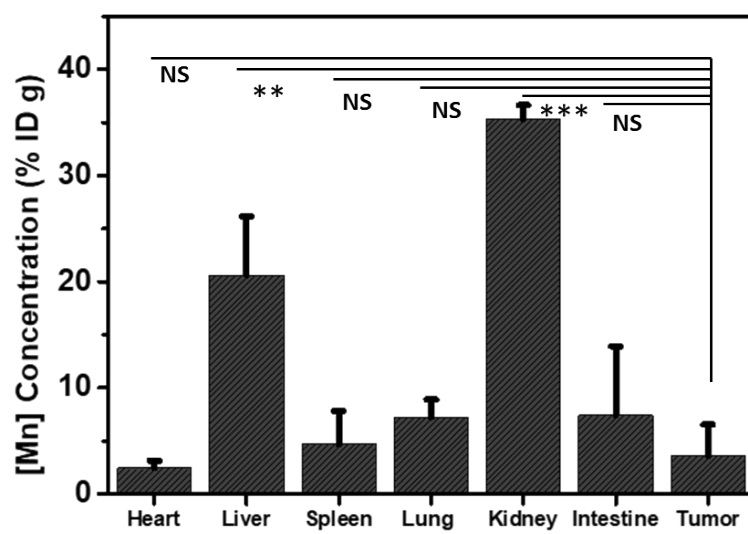

Figure S6. One day after administration, Mn content in main organs and tumor of 4T1 orthotopic tumor-bearing mice ( $0.02 \text{ mmol kg}^{-1} \text{ Mn}$ ).
